1 **Title Page**

2

3 **The *Salix* SmSPR1 Involved in Light-Regulated Cell Expansion by Modulating Microtubule**

4 **Arrangement**

5 Liu Xiaoxia<sup>1</sup>, Zhang Jianguo<sup>1,2,3\*</sup>, Sui Jinkai<sup>3</sup>, Luo Ying<sup>1</sup>, Rao Guodong<sup>1\*</sup>

6 <sup>1</sup> State Key Laboratory of Tree Genetics and Breeding, Research Institute of Forestry, Chinese Academy  
7 of Forestry, Beijing 100091, China

8 <sup>2</sup> Collaborative Innovation Center of Sustainable Forestry in Southern China, Nanjing Forestry  
9 University, Nanjing 210037, China

10 <sup>3</sup> Key Laboratory of Tree Breeding and Cultivation, National Forestry and Grassland Administration,  
11 Research Institute of Forestry, Chinese Academy of Forestry, Beijing 100091, China

12 \*Corresponding author: Rao Guodong, [rgd@caf.ac.cn](mailto:rgd@caf.ac.cn);

13 Zhang Jianguo, [Ralf02@163.com](mailto:Ralf02@163.com)

14

15 **Authors email:**

16 Liu Xiaoxia: [liuxiaoxia0856@163.com](mailto:liuxiaoxia0856@163.com)

17 Zhang Jianguo: [Ralf02@163.com](mailto:Ralf02@163.com)

18 Sui Jinkai: [suijinkai02@163.co](mailto:suijinkai02@163.co)

19 Luo Ying: [luoying199402@163.co](mailto:luoying199402@163.co)

20 Rao Guodong: [rgd@caf.ac.cn](mailto:rgd@caf.ac.cn)

21

22 **Date of submission:** 12, Jun, 2019

23 **Number of tables and figures:** 7 figures, all in colour in print and online version

24 **Word counts:** 6,474

25 **Supplementary data:** 7 Supplementary figures and 7 Supplementary tables

26 .

27 **Title:** The *Salix* SmSPR1 Involved in Light-Regulated Cell Expansion by Modulating Microtubule  
28 Arrangement

29  
30 **Running title:** SPR1 function in MT Elongation and polymerization

31  
32 **Highlight:** Function of microtubule-associated protein SPR1 is directly related to light, and crucial to  
33 the balance of tubulin polymerization

34  
35 **Abstract:**

36 Light signaling and cortical microtubule (MT) arrays are essential to the anisotropic growth of plant  
37 cells. Microtubule-associated proteins (MAPs) function as regulators that mediate plant cell expansion  
38 or elongation by altering the arrangements of the MT arrays. However, current understanding of the  
39 molecular mechanism of MAPs in relation to light to regulate cell expansion or elongation is limited.  
40 Here, we show that the microtubule-associated protein SPR1 is involved in light-regulated directional  
41 cell expansion by modulating microtubule elongation in *Salix matsudana*. Overexpression of *SmSPR1* in  
42 Arabidopsis results in right-handed helical orientation of hypocotyls in dark-grown etiolated seedlings,  
43 whereas the phenotype of transgenic plants was indistinguishable from those of wild-type plants under  
44 light conditions. Phenotypic characterization of the transgenic plants showed reduced anisotropic growth  
45 and left-handed helical MT arrays in etiolated hypocotyl cells. Protein interaction assays revealed that  
46 SPR1, CSN5A (subunits of COP9 signalosome, a negative regulator of photomorphogenesis), and  
47 ELONGATED HYPOCOTYL 5 (HY5, a transcription factor that promotes photomorphogenesis)  
48 interacted with each other *in vivo*. The phenotype of Arabidopsis *AtSPR1*-overexpressing transgenic  
49 lines was similar to that of *SmSPR1*-overexpressing transgenic plants, and overexpression of *Salix*  
50 *SmSPR1* can rescue the *spr1* mutant phenotype, thereby revealing the function of SPR1 in plants.

51  
52 **Keywords:** *Salix matsudana*, microtubule, microtubule-associated proteins, protein interaction, light  
53 regulation, cell expansion and elongation, SPR1

54

## 55 **Introduction**

56 Plant cells exhibit different development patterns, ranging from skotomorphogenic development in  
57 darkness to photomorphogenesis. Cell proliferation of skotomorphogenesis in dark-grown seedlings  
58 does not significantly change, whereas the hypocotyl rapidly elongates in one direction, and this highly  
59 directional cell expansion results in the elongation of this specific organ. This process is accompanied by  
60 an apical hook, which is attenuated by pro-plastid differentiation that is essential to the initiation of a  
61 newly germinated seedling to push through the soil. In contrast, when seedlings are exposed to light,  
62 hypocotyl elongation is limited, petioles and cotyledons open, pro-plasmids develop into chloroplasts,  
63 and roots elongate (And and Deng, 1996; Gendreau *et al.*, 1997). Previous studies have demonstrated  
64 that many factors mediate cell expansion and elongation in the dark and light, which include multiple  
65 photoreceptors, plant hormones, and transcription factors (Castillon *et al.*, 2007; Galv ão and Fankhauser,  
66 2015). These studies have largely concerned with the identification of upstream influence factors in  
67 mediating dark- or light-related signal pathways, and how plants coordinate downstream regulators  
68 during cell expansion is still unclear.

69 Both genetics and physiology support the view that the arrangement of cortical microtubule (MT)  
70 participates in the regulation of cell expansion and elongation. In rapidly extending cells such as the  
71 tissues of the hypocotyl in etiolated seedlings, cortical MTs are predominantly arranged in parallel with  
72 each other, which results in transverse growth to the growth direction (Galva *et al.*, 2014; Sedbrook and  
73 Kaloriti, 2008). In contrast, as cell elongation slows down, the arrangements of the MTs shift from  
74 parallel to oblique or longitudinal in direction (Barker *et al.*, 2010; Crowell *et al.*, 2011). These MT  
75 arrangements guide the positioning and trajectories of cellulose-synthesizing protein complexes as these  
76 track along cortical MTs beneath the plasma membrane and deposit cellulose microfibrils around the  
77 entire cell, and the orientation of microfibrils cross-lined with hemicelluloses mainly determines cell  
78 expansion and elongation (Brandizzi and Wasteneys, 2013; Foster *et al.*, 2003; Fujita *et al.*, 2012). The  
79 transverse orientation of cortical MTs in etiolated hypocotyl cells is reorganized into an oblique or  
80 longitudinal array when seedlings are exposed to light, which also slows down cell elongation in the  
81 hypocotyl (Sambade *et al.*, 2012), indicating a connection between cortical MT arrangements and light  
82 signals.

83 The arrangement of MT arrays is related to plant morphology, and rearrangements of cortical MTs  
84 from transverse to left-handed (right-handed) helical or oblique alignment have been proposed to drive  
85 cells from elongation to expansion, which results in the twisted growth of plant organs (Galva *et al.*,

86 2014). Microtubule-associated proteins (MAPs) regulate the organization and dynamics of MTs.  
87 Numerous studies have shown that MAP regulates cell expansion and elongation by altering the  
88 arrangement and dynamics of cortical MT (Lian *et al.*, 2017; Lucas *et al.*, 2011; Shoji *et al.*, 2004; Sun  
89 *et al.*, 2015). SPIRAL1 (SPR1) is a plant-specific MAP that was identified in an *Arabidopsis spr1*  
90 mutant that exhibited helical root growth. When grown on a tilted hard-agar surface, right hand spiral  
91 appears in the *spr1* epidermal cells of the root, and the roots of *spr1* exhibit right directional growth  
92 when viewed from above the agar plates (Furutani *et al.*, 2000). The arrangement of cortical MTs in root  
93 elongation zone showed a phenotype of the left-handed helix in the *spr1* mutant, rather than parallel  
94 alignment in the wild-type plants (Nakajima *et al.*, 2004). From these observations, Furutani *et al.*  
95 therefore concluded that SPR1 plays an important role in maintaining the function integrity of cortical  
96 MTs and is essential for anisotropic expansion of cells. Previous studies have shown that SPR1 binds to  
97 another plus-end tracking protein EB and synergistically regulates the polymerization and elongation of  
98 MTs (Furutani *et al.*, 2000; Galva *et al.*, 2014). SPR1 can also be ubiquitinated under salt stress by 26S  
99 proteasome and accelerate the depolymerization and reorganization of MTs, which is required for plant  
100 salt stress tolerance (Wang *et al.*, 2011). Whether SPR1 has other interacting proteins that are involved  
101 in regulating polymerization and elongation of MTs remains unclear.

102 *Salix* (willow) are widely distributed, from North America to China, and contain more than 300  
103 species varying from small shrubs to trees (Barker *et al.*, 2010). The phenotypes of *Salix matsudana* and  
104 its varieties are diverse, including the phenotype of branch spiral, the phenotype of vertical growth of  
105 branch, and the spherical phenotype of crown, making it a good material for studying tree morphology.  
106 In this study, we identified six *SmSPR1* genes from *S. matsudana*, and qRT-PCR-based tissue-specific  
107 transcript abundance analysis showed that *SmSPR1* is upregulated in all tissues tested. We then analyzed  
108 this gene in greater detail. Overexpression of *SmSPR1* in *Arabidopsis* resulted in hypocotyl helical  
109 growth in etiolated seedlings, whereas no hypocotyl helical growth or root twisting was observed in  
110 transgenic seedlings growth in the presence of light. To rule out that the helix phenotype was caused by  
111 heterologous expression, we overexpressed the *Arabidopsis AtSPR1* gene and obtained the same  
112 phenotype. We then transferred the helical etiolated seedling to light conditions, which resulted in  
113 straight new upper hypocotyls, and the formed lower stem also showed the right-handed helical  
114 orientation. However, the straight light-grown hypocotyl twisted when the transferred to the dark. Given  
115 that light regulates the helical growth of seedling hypocotyls, we then set out to identify light-related  
116 proteins that interact with *SmSPR1*. Here, we show that SPR1, CSN5A, and HY5 interacted with each

117 other *in vivo*, and influencing anisotropic cell growth in *Arabidopsis*. We propose a model that *SPR1*  
118 mediates the strength balance of MTs, either via loss of function or overexpression of *SPR1*, eventually  
119 resulting in the helical growth of MTs.

## 120 **Materials and Methods**

### 121 **Plant materials**

122 *S. matsudana* Koidzin in this study were collected from the Beijing Botanical Garden. The leaves,  
123 annual shoot tips, and stems were frozen in liquid nitrogen and then stored at -80 °C. All *A. thaliana*  
124 plants were of the Columbia-0 ecotype (Col-0). Mutant *spr1* seeds (CS6547) and 35S:Tubulin6B-GFP  
125 (CS6550) transgenic seeds were obtained from the Arabidopsis Biological Resource Center (ABRC;  
126 <https://www.arabidopsis.org/>).

127 For plant physiological analysis, the seeds were surface-sterilized for 1 min with 70% (v/v) ethanol  
128 and then washed with 15% (v/v) sodium hypochlorite (~10%) for 12 min. The transformed seeds were  
129 sown on MS plates with 3% sucrose and 0.6% agar containing 50 mg/L kanamycin for mutant selection  
130 or 25 mg/L phosphinothricin for transgenic selection. For phenotypic analysis and biochemical assays,  
131 the seeds were placed on half-strength MS medium containing 0.8% agar and 1% sucrose. For the  
132 hypocotyl measurements, the plates were transferred to 22 °C in the light or dark for 7 d after  
133 stratification at 4 °C for 3 d.

### 134 **Sequence identification and analysis of SmSPR1 promoter**

135 *Populus* and Arabidopsis *CSN5A*, *COP1*, *HY5*, and *SPR1* family genes were used for identifying the  
136 CDS homologs of the *SPR1*, *CSN5A*, *COP1*, and *HY5* genes in *S. matsudana* using BLAST. The primers  
137 used for amplification of full-length *SPR1*, *CSN5A*, *COP1* and *HY5* are listed in Supplemental Table S1.  
138 Phylogenetic analysis was performed using the software MEGA 6 (Tamura *et al.*, 2013). The  
139 phylogenetic relationship of the genetic model was assessed using neighbor-joining tree with 1,000  
140 bootstrap trials.

141 The promoter of *SmSPR1* was subjected to homology-based cloning according to the genome  
142 sequence of *Salix suchowensis* and *Populus trichocarpa*. The sequence and then cloned into *pBII21*  
143 vector, replacing the *Cauliflower mosaic virus* (CaMV) 35S promoter, to drive the *GUS*  
144 ( $\beta$ -glucuronidase) reporter gene. Then the recombinant *pBII21-SmSPR1::GUS* construct was  
145 transformed into *Tabaco* plants using *Agrobacterium tumefaciens* (strain GV3101). The stem, root, and  
146 petiole section of transformed plantlets and the 10-days-old seedlings were used for histochemical

147 staining. The GUS staining procedure was performed as described according to previous study (Hwang  
148 *et al.*, 2014).

### 149 **Semi RT-PCR and real-time PCR**

150 Semi RT-PCR was used for determination the expression level of *SmSPR1* and *AtSPR1* in the  
151 wild-type and transgenic plants. *Arabidopsis 18S rRNA* (At3G41768) was used as a loading control. The  
152 primers used for these assays are described in Supplemental Table S2.

153 Real-time PCR was performed for the quantification of *SmSPR1* family member transcripts in the  
154 tissue of shoot tips, roots, stems, xylem, and phloem. The RNA was isolated from *S. matsudana* using  
155 Plant RNA extraction kit (CWbio. Co., Ltd.) and SYBR GreenI Taq Mix (CWbio. Co., Ltd.) was used as  
156 fluorochrome. The *SmSPR1* gene family primers are listed in Supplementary Table S3. GAPDH was  
157 used as internal standard. All reactions were repeated at least three times under identical conditions.

### 158 **Generation of SmSPR1 and AtSPR1 overexpression transgenic plants**

159 For the *spr1* mutant of the Arabidopsis complement test and *AtSPR1* overexpression assay, *SmSPR1*  
160 and *AtSPR1* cDNA was amplified and introduced into pDONR221 via BP reaction and to  
161 pEarleyGate104 of Gateway vectors via LR recombinase (Invitrogen) (Earley *et al.*, 2010). All primers  
162 are listed in Supplemental Table S4. The resulting constructs were transformed into Arabidopsis using  
163 *Agrobacterium tumefaciens* (GV3101) via Arabidopsis floral dip method as described elsewhere (Zhang  
164 *et al.*, 2006). The homozygous T3 seedlings were used for further analyses.

### 165 **Phenotypic analysis**

166 The spiral phenotypes of seedlings were observed using an Ultra depth of field microscope (Leica  
167 DVM6) equipped with CCD (PLANAPO FOV 12.55). For measuring length and width of hypocotyl and  
168 root, the relevant parameter was measured using ImageJ (<http://rsb.info.nih.gov/ij/>). Hypocotyls of  
169 five-day-old seedlings were fixed with 50% FAA and then embedded in spr resin (SPI). A series of  
170 4- $\mu$ m thick longitudinal sections and transverse sections (rapidly elongating region) were made with a  
171 rotary microtome RM2265 (LEICA EM UC7). Fixed sections were stained with toluidine blue O for 30  
172 min and photographed with an Olympus BX51 microscope equipped with a DP74 camera.

173 For drug treatment, wild and transgenic seeds were grown on 0.8% agar-solidified 1/2 MS vertically  
174 oriented plates for 7 days with or without specific concentration of Propyzamide (Sigma-Aldrich). To  
175 detect the morphology of the cells of 7-day-old seedlings, etiolated hypocotyls and roots were soaked in

176 10  $\mu$ M PI (Sigma-Aldrich). Zeiss LSM510 confocal microscope (with 543 nm diode laser, and an  
177 emission band of 560 to 690 nm) was used for images collecting.

178 For measurement of MT arrays, *SmSPR1* was over-expressed in *35S: GFP-TUB6* background and  
179 detected on a Zeiss LSM510 confocal microscope. The orientation of cortical MTs in epidermal cell was  
180 measured at upper regions. Measurements were performed using ImageJ (<http://rsb.info.nih.gov/ij/>).  
181 Microtubules with clear visible were selected for measurements in each cell ( $n \geq 25$  cells). The procedure  
182 was performed as previously described (Liu *et al.*, 2013).

### 183 **Protein Purification and Pull-down assay**

184 The pET28a-SmSPR1-His (SmSPR1-His), pET21a-HY5-Flag (HY5-Flag) and  
185 pGEX4T1-GST-SmCSN5A-Flag (GST-SmCSN5A-Flag) clones were transformed into the Rosetta. All  
186 primers for constructing prokaryotic expression vectors are listed in Supplemental Table S5. The protein  
187 prokaryotic expression and purification was according to the instruction of Ni-NTA Agarose  
188 (Cat.No.30210, QIAGEN) and Glutathione Sepharose (GE).

### 189 **Yeast Two-Hybrid analysis**

190 The CDS of *SmCSN5A*, *SmCOP1* and *SmHY5* were constructed on the yeast two-hybrid prey vector  
191 pGADT7, respectively. SmSPR1 was constructed on the bait vector pGBKT7. The primers were listed  
192 in Supplemental Table S6. The bait vector of *SmSPR1* was transformed with *SmCSN5A*, *SmCOP1* and  
193 *SmHY5* respectively into the yeast strain AH109 as instructions for Matchmaker GAL4 Two-Hybrid  
194 Systems 3 (Clontech). Yeast Two-Hybrid analysis were performed following Yeast Protocols Handbook  
195 (Clontech). Transformed yeast cells were separately spread to 2D synthetic deficiency medium (SD-TL:  
196 -Trp/-Leu) and 4D selective medium (SD-TLHA: -Trp/-Leu/-His/-Ade) and then placed at 30  $^{\circ}$ C for 4  
197 days. Saturated yeast cells were dilute to 1:1, 1:10, 1:100, 1:200, 1:500, and 1:1,000, and then spotted  
198 onto the selection medium.

### 199 **Bimolecular Fluorescence Complementation (BiFC) Assay**

200 BiFC assays were performed using pEarleyGate vectors (pEarleyGate201-YN, pEarleyGate202-YC).  
201 The vectors were kindly supplied by Dr. Bin Tan (Yi *et al.*, 2013). The cDNA encoding SmCSN5A,  
202 SmCOP1, and SmHY5 were fused with the C-terminal fragment of YFP. SmSPR1 was fused to the  
203 fragment encoding the N-terminus of YFP. The primers used for BiFC were listed in Supplemental  
204 Table S7. All vectors were transformed into Agrobacterium strain (GV3101). The transient expression  
205 was according to the method of (Sparkes *et al.*, 2006). Detection of BiFC signals was visualized by



206 Zeiss LSM510 microscope. The excitation light had a wavelength of 514 nm, and the emission light  
207 receiving range was 525-555 nm. The experimental results were analyzed using Zen software.

## 208 **Statistical analyses**

209 The quantitative data were analyzed using a one-variable general linear model procedure (ANOVA)  
210 with the SPSS software package (SPSS Inc., <http://www.spss.com.cn>). Analysis of significance was  
211 performed using t test or Duncan's multiple range tests at  $P \leq 0.05$  or  $P \leq 0.01$ . Data are reported as the  
212 mean  $\pm$  SE of three or more experiments.

## 213 **Accession numbers**

214 Sequence data from this article can be found in the GenBank data libraries under accession numbers:  
215 *SmSPR1*, MK770432; *SmSPR1\_L1*, MK770433; *SmSPR1\_L2*, MK770434; *SmSPR1\_L3*, MK770435;  
216 *SmSPR1\_L4*, MK770436; *SmSPR1\_L5*, MK770437; *SmCOP1*, MK770438; *SmCSN5A*, MK770439;  
217 *SmHY5*, MK770440.

## 218 **Results**

### 219 **Cloning and Expression Pattern of the *SmSPR1* Genes**

220 A total of six *SmSPR1* genes were identified according to the sequences of the Arabidopsis *SPR1*  
221 family genes (Nakajima *et al.*, 2006; Sedbrook *et al.*, 2004). These *SmSPR1s* were then isolated from *S.*  
222 *matsudana* using PCR-based approaches with gene-specific primers (Supplemental Table S1). We  
223 named these *Salix SPR1* genes as *SmSPR1* and *SmSPR1-LIKE* genes (*SmSPR1\_L1-SmSPR1\_L5*) based  
224 on their amino acids sequence identity and phylogenetic relationship with Arabidopsis *SPR1* family  
225 genes (Fig. 1A). All *Salix* and Arabidopsis *SPR1s* were classified into three classes (designated to Class  
226 I- III): Class I included *Salix* *SPR1*, *SPR1\_L3*, *SPR1\_L4*, with Arabidopsis *SPR1* and *SPR1L2*; Class II  
227 consisted of *Salix* *SPR1\_L1* and *SPR1\_L2* and Arabidopsis *SPR1L3*, *SPR1L4* and *SPR1L5*; and Class  
228 III comprised *Salix* *SPR1\_L5*. *Salix* *SPR1* and its homolog sequences shared N- and C- terminal regions  
229 except *SmSPR1\_L5*, and the outgroup position of *SmSPR1\_L5* may be due to the absent of conserved  
230 C-terminal region (Fig. 1B). Highly conserved repeat amino acids sequences were observed at the N-  
231 and C-termini in *SmSPR1*, *L1*, *L2*, and *L4*, with the consensus motif being GGG/DQ/SSSLG/DY/FLFG  
232 (Fig. 1B). At the C-terminal of this conserved motif, the PGGG sequence is present in many mammalian  
233 MAPs and is a conserved binding sequence of microtubules (Nakajima *et al.*, 2004).

234 To determine *SmSPR1* expression level at different tissues, we conducted a qRT-PCR-based  
235 tissue-specific transcript abundance analysis of five tissues (shoot tips, xylem, phloem, leaves, and roots)



236 from three trees with gene-specific primers, and the transcript expression level of six *Salix SPR1* genes  
237 are shown in Fig. 1C. Class I *SPR1* gene had the highest expression level and was detected at almost  
238 equal levels in all tissues tested. *SPR1\_L3* and *SPR1\_L4*, which also belong to Class I, were expressed in  
239 all tissues, with a moderate transcript level compared to *SPR1*. The expression levels of Class II  
240 *SPR1\_L1* and *SPR1\_L2* were significantly lower than those of the Class I genes, and extremely low  
241 transcript levels were observed in the roots of *SPR1\_L2* and *SPR1\_L5*. The relative expression levels of  
242 Class I *SPR1* members were higher than those of Class II and III *SPR1* members, suggesting the Class I  
243 *SPR1* family genes, especially *SmSPR1*, is the major gene in *Salix*, similar to the results of Arabidopsis  
244 *AtSPR1*, which also had a predominant transcript level in all tissues tested (Nakajima *et al.*, 2004).

245 To further obtain details on the tissue specific expression pattern of *SmSPR1*, we generated transgenic  
246 tobaccos (*Nicotiana tabacum*) of  $P_{SmSPR1}: GUS$  which were then stained for GUS for GUS activity test.  
247 Strong GUS activity was observed at the internodes of stems, including phloem, cambium, and xylem,  
248 but not in epidermal cells (Fig. 1D). Midveins at each internode were also stained for GUS activity, and  
249 a similar expression pattern was obtained as that observed in the stems; GUS staining was also observed  
250 in vascular tissues, which included strong GUS staining in the phloem, moderate GUS staining of the  
251 cambium and xylem, and negative GUS staining of the epidermal cells (Fig. 1E). Axillary buds and root  
252 tips showed significantly strong GUS activity in all tissues tested (Figs. 1F, G), indicating that *SmSPR1*  
253 has a high transcript expression level in the meristem and elongation zone. Transgenic tobacco seedlings,  
254 which were grown both in the dark and under continuous light, were also stained for the GUS activity.  
255 Strong GUS activity was detected in the hypocotyls and roots of dark-grown seedlings (Fig. 1H), and  
256 high *SmSPR1* expression levels were detected in the shoot tips and roots of seedlings grown in light  
257 conditions (Fig. 1I).

258 To investigate the subcellular localization of *SmSPR1*, a  $P35S-SmSPR1-GFP$  fusion construct were  
259 generated and transiently expressed in Arabidopsis using a *A. tumefaciens*-mediated transformation  
260 approach. In non-plasmolyzed Arabidopsis leaf epidermal cells, the SmSPR1-GFP fusion protein was  
261 detected in the cell periphery, nuclei, and cytoplasm, but not in chloroplasts (Fig. 1J-M). The subcellular  
262 localization of SmSPR1 was examined by expressing the SmSPR1-GFP fusion protein in protoplasts  
263 prepared from Arabidopsis suspension-cultured cells, which was observed as a strong fluorescence  
264 signal, and the SmSPR1-GFP fusion protein was also observed in the cell periphery, nuclei, and  
265 cytoplasm, but not in chloroplasts (Fig. 1O-V).

## 266 ***SmSPR1* Transgenic Seedling Phenotype**

267 To determine the function of SmSPR1, the *P35S: SmSPR1* transgenic Arabidopsis in the wild-type  
268 Col-0 background were generated. We identified 14 *P35S:SmSPR1* transgenic lines, all of which showed  
269 similar phenotypes. The phenotype of the transgenic plants was indistinguishable from those of the  
270 wild-type plants in the presence of light (Supplemental Fig. S1). This result also coincided with the  
271 phenotype of Arabidopsis *SPRI* overexpression transgenic lines (Nakajima *et al.*, 2004). However, the  
272 hypocotyls in dark-grown seedling exhibited a right-handed helical orientation to the epidermal cells  
273 (Figs. 2A-B, Supplemental Fig. S2).

274 To test whether the right-handed helical phenotype is the result of posttranscriptional gene silencing,  
275 semi-quantitative RT-PCR analysis was performed to determine the transcription levels of the *SmSPR1*  
276 and Arabidopsis *SPRI* family genes. A total of six Arabidopsis *SPRI* family genes were tested, and each  
277 gene showed moderate expression levels both in the wild-type and transgenic plants. High levels of  
278 *SmSPR1* transcripts were observed in the *P35S:SmSPR1* transgenic plants, whereas no *SmSPR1*  
279 transcripts were detected in the wild-type plants that were grown separately in dark and light conditions  
280 (Fig. 2C). These results suggested that the right-handed helical phenotype could be attributed to the high  
281 transcription levels of *SmSPR1* rather than Arabidopsis *SPRI*s posttranscriptional gene silencing. In  
282 addition, this right-handed helical phenotype was only observed after three days of growth in the dark,  
283 and it is notable that only the upper hypocotyl of etiolated seedlings showed the right-handed helical  
284 orientation (Fig. 2D, Supplemental Figs. S2 and S3). No differences in hypocotyl and root length were  
285 observed, although hypocotyl width significantly differed between the transgenic and wild-type plants  
286 (Student's *t* test,  $P < 0.01$ , Figs. 2E-H). Considerable evidence indicates that Arabidopsis *spr1* mutants  
287 exhibit root morphological changes, which include twisted root epidermal cells and right directional root  
288 development when grown on vertically oriented hard agar plates (Nakajima *et al.*, 2004; Nakajima *et al.*,  
289 2006; Sedbrook *et al.*, 2004). We then surveyed the appearance of roots in the *P35S:SmSPR1* transgenic  
290 and wild-type plants, and the phenotypes of the roots were also indistinguishable from those of the wild  
291 type that were grown in the dark (Supplemental Fig. S2).

292 To investigate changes in the phenotype of *SmSPR1* overexpression plants at the cellular level,  
293 resin-embedded transverse and longitudinal sections of the upper region of etiolated hypocotyls of the  
294 seedlings were prepared. The results showed that the cross-sectional hypocotyl area of the transgenic  
295 plants was significantly larger than that of wild-type plants, and this enlargement was caused by the  
296 expansion of cells (Figs. 3A, B). The longitudinal section also showed bigger hypocotyls as well as cell  
297 expansion (Figs. 3C, D). Next, the *SmSPR1* gene was overexpressed in the *P35S:GFP:AtTUA6*

298 Arabidopsis background. We then observed the arrangement of MTs of etiolated hypocotyls in the  
299 wild-type and transgenic plants. No differences in the MTs were observed between the wild-type and  
300 transgenic plants that were grown in the presence of light (Figs. 3E, F). In etiolated seedlings, the  
301 arrangement of MTs in the hypocotyl of wild-type plants was mainly parallel to each other and  
302 perpendicular to the long axis, whereas the MT arrays of the transgenic plants predominantly showed  
303 left-handed spiral growth (Figs. 3G, I).

304 Taken together with the fact that transgenic seedling epidermal cells had right-handed helical  
305 orientation in the absence of light, that finding raised the question of whether the internal region is also  
306 affected by the overexpressed *SmSPR1* gene. To assess this, confocal microscopy was performed assess  
307 cell shapes and sizes layer by layer, and a total of 15 cell layers was obtained from one side to the  
308 opposite side of the tissues. The angles of the right-handed helical orientation from the first layer to the  
309 middle layer (8<sup>th</sup> layer) gradually decreased. Scanning from the 8<sup>th</sup> layer to 15<sup>th</sup> layer revealed that the  
310 angle of helical orientation negatively increased to the left-handed helical orientation (Fig. 3J). In sum,  
311 the helical phenotype was observed in most layers of the hypocotyl and was not limited to the epidermal  
312 cells under dark condition. We also stained the tissues of seedlings grown in the presence of light with PI,  
313 all of which were indistinguishable between the wild-type and the transgenic plants (Supplemental Fig.  
314 1D).

### 315 **Overexpression of SmSPR1 Results in Strong Tolerance to an MT-depolymerizing Drug**

316 To localize the SmSPR1 protein, we constructed an SmSPR1:GFP fusion protein vector and  
317 transfected it into Arabidopsis. GFP signals were assessed by confocal laser scanning microscopy, which  
318 revealed filamentous structures in the hypocotyl, roots, leaves, and other tissues. Further observations  
319 showed that the green fluorescence signals of SmSPR1-GFP coincides with the immunofluorescence  
320 (red) of tubulin, demonstrating that SmSPR1 co-localizes with the MTs (Figs. 4A, Supplemental Fig.  
321 S4). A microtubule-depolymerizing drug, propyzamide (PPM), was then used to assess changes in  
322 *SmSPR1:GFP* transgenic lines. With the addition of PPM, no fluorescence signals of SmSPR1-GFP  
323 were observed, and after the removal of PPM, the green fluorescence of SmSPR1-GFP was again  
324 detected (Fig. 4B). This coincides with the depolymerization and reorganization of MTs, which also  
325 demonstrates the co-localization of SmSPR1 with MTs.

326 A previous study showed that the Arabidopsis *P35S:AtSPR1* line has a moderately higher resistance to  
327 long-term treatment with PPM, and the maximum survival concentration of *P35S:AtSPR1* line is 5  $\mu$ M  
328 (Nakajima *et al.*, 2004). To determine whether SmSPR1 plays a similar function, *P35S:SmSPR1*

329 transgenic seedlings were planted in agar medium containing PPM with different concentrations (Fig. 4,  
330 Supplemental Fig. S5). The roots of *P35S:SmSPR1* transgenic seedlings retained the ability to elongate  
331 compared to the wild type in the presence of 9  $\mu\text{M}$  of PPM (Fig. 4C). PI staining showed that the roots  
332 of the wild-type plants exhibited a left-handed helical orientation with 3  $\mu\text{M}$  of PPM, and the cells  
333 expanded or even dissociated at 5  $\mu\text{M}$ , whereas roots of the transgenic plants showed a left-handed  
334 helical structure with 7  $\mu\text{M}$  PPM, and the cells swelled at 9  $\mu\text{M}$  (Figs. 4D-G). Our results indicated that  
335 the *P35S:SmSPR1* lines were highly tolerant of the MT-depolymerizing drug, surviving at a PPM  
336 concentration of 9  $\mu\text{M}$ .

### 337 **Salix SmSPR1 and Arabidopsis AtSPR1 have Similar Biological Functions**

338 To determine whether SmSPR1 has a similar biological function to Arabidopsis AtSPR1, we  
339 constructed an overexpression vector carrying the CaMV 35S promoter linked to *SmSPR1*, and  
340 transformed it into the Arabidopsis *spr1* mutant background. A total of 25 independent transgenic lines  
341 were generated, and their phenotypes were all analyzed in both light and dark conditions, and all  
342 transgenic lines showed similar phenotypes. The phenotype of the light-grown Arabidopsis *spr1* showed  
343 roots skewing to the right, which was rescued in the overexpression *SmSPR1* lines (Fig. 5A). In the dark,  
344 Arabidopsis *spr1* exhibited hypocotyl phenotype of right-handed helix, which was also rescued in the  
345 overexpression *SmSPR1* lines (Fig. 5B). Semi-quantitative RT-PCR analyses were used to assess the  
346 transcription levels of the *SmSPR1* gene in the wild, *spr1* mutant, and overexpression *SmSPR1* lines,  
347 which showed that only the *SmSPR1* overexpression lines expressed the *SmSPR1* gene (Fig. 5C). These  
348 results demonstrate that SmSPR1 and AtSPR1 have similar biological functions and play a role in  
349 maintaining anisotropic expansion of cells and straight growth of plants.

350 To examine the generality of the SPR1 function in plants, we reconstructed the Arabidopsis *AtSPR1*  
351 overexpression vector under the control of CaMV 35S promoter and transformed it into the wild-type  
352 Col. The phenotype of the *AtSPR1* overexpressing transgenic plants was similar to that of *SmSPR1*  
353 overexpressing transgenic plants. In the dark, the hypocotyls of the etiolated seedlings also showed a  
354 right-handed helix phenotype after three days (Fig. 5D). In the presence of light, there was no difference  
355 between the transgenic plants and the wild-type phenotype (Supplemental Fig. S6). Semi-quantitative  
356 RT-PCR analyses revealed the transcription levels of the *AtSPR1* genes, which indicated that the  
357 right-handed helical phenotype was not the result of posttranscriptional gene silencing (Fig. 5E).

358

## 359 **SPR1, CSN5A, and HY5 Physically Interact with Each Other *In Vivo***

360 The appearance of the right-handed helical orientation in etiolated but not in light-grown seedling  
361 prompted us to hypothesize that the helical phenotype is related to light. We then transferred the helical  
362 etiolated seedling (5 days) to light conditions, which resulted in straight, newly grown upper hypocotyls  
363 (stems) after 4 days of growth, and the formed lower stems also showed right-handed helical orientation  
364 (Fig. 6A). On the other side, we transferred the light-grown seedling (5 days) to the dark environment,  
365 and after 6 days of growth, the upper hypocotyl cells rapidly elongated and formed right-handed helical  
366 epidermal cells (Fig. 6B). Taken together, our data demonstrated that the right-handed helical orientation  
367 of upper epidermal cells in transgenic plants was directly triggered by light. Therefore, we hypothesized  
368 that there are light-regulated proteins that can bind to SPR1 and participate in anisotropic cell growth. To  
369 verify this hypothesis, we next screened the interaction protein of SPR1 using a pull-down assay, yeast  
370 two-hybrid (Y2H), and a biomolecular fluorescence complementation (BiFC) assay.

371 Pull-down assays of plant extracts were conducted to identify proteins that physically interact with  
372 SPR1. Glutathione S-transferase (GST)-fused SPR1 proteins were first expressed in an *Escherichia coli*  
373 system and affinity purified. Recombinant GST alone and GST- SPR1 were then used as baits to identify  
374 the interacting proteins. SDS-PAGE gels were used to separate precipitates, which were then analyzed  
375 by matrix-assisted laser desorption ionization time-of-flight mass spectroscopy (MALDI- TOF- MS). A  
376 total of 1,145 peptide fragments that could be assembled into 451 proteins were identified, and different  
377 proteins detected between GST alone and GST- SPR1 were used as baits for functional annotation in the  
378 Nr database. We then conducted a yeast two-hybrid screen to detect the interacting proteins of SmSPR1,  
379 and a total of 11 proteins were identified. By combining these two results, three light-related proteins  
380 (CSN5A, HY5, and COP1) were next selected for further validation. We conducted a yeast two-hybrid  
381 one-to-one verification, which indicated that CSN5A and HY5, but not COP1, interacted with SPR1 (Fig.  
382 6C). To confirm whether these three proteins could interact with SPR1 *in vivo*, we performed a BiFC  
383 assay using tobacco epidermal cells in both dark and light conditions. In the presence of light,  
384 co-expression of SPR1-CSN5A showed strong YFP fluorescence in the nuclei and cytomembrane,  
385 whereas SPR1-HY5 was only co-expressed in the nuclei (Fig. 6D), and no fluorescence was observed in  
386 the SPR1-COP1 combination. In the dark, co-expression of SPR1-CSN5A also exhibited strong YFP  
387 fluorescence, whereas the SPR1-HY5 combination was not reconstituted in the functional YFP  
388 (Supplemental Fig. S7). The fact that both CSN5A and HY5 physically interact with SPR1 prompted us  
389 to investigate whether CSN5A and HY5 interact with each other using BiFC, which revealed a strong

390 physical interaction in the presence of light (Fig. 6D).

## 391 DISCUSSION

392 Amino acid sequence alignment of SmSPR1s showed that, similar to the Arabidopsis SPR1 family  
393 proteins, the amino acid sequence of SmSPR1s is conserved at the N- and C-termini (Fig. 1B). Previous  
394 studies have demonstrated that the N- and C-termini of AtSPR1s can bind to MTs individually and  
395 perform partial functions (Nakajima *et al.*, 2004). Therefore, we speculate that the N- and C-termini of  
396 SmSPR1s also have core functions, and the middle region with a certain length and a random sequence  
397 is only used as a connection and spacer between the two core regions. Interestingly, SmSPR1\_L5 is  
398 conserved only at the N-terminus of the amino acid, whereas the C-terminus is a variable region.  
399 Combined with the results of real-time PCR, the expression level of the SmSPR1\_L5 gene is extremely  
400 low in all assayed tissues (Fig. 1C). We inferred that *SmSPR1\_L5* is a redundant gene, and it is possible  
401 that its function has been lost.

402 A previous study has shown that the root epidermal cells of overexpression Arabidopsis AtSPR1  
403 transgenic lines are indistinguishable from the wild type, and increased *AtSPR1* expression does not  
404 cause root twisting. The cell elongation kinetics of the *P35S:AtSPR1* transgenic lines and the wild type  
405 were also compared using dark-grown hypocotyls, while in this process, the helical phenotype was also  
406 not observed (Nakajima *et al.*, 2004; Sedbrook *et al.*, 2004). However, a right-handed helical orientation  
407 of hypocotyl epidermal cells in dark-grown seedlings was observed in the *P35S:SmSPR1* transgenic  
408 lines (Figs. 2A, B), which raised the question of whether overexpression of Arabidopsis AtSPR1 results  
409 in a helical phenotype. To address this, overexpression of Arabidopsis *AtSPR1* was repeated, which  
410 showed a similar right-handed helix in etiolated seedlings compared to *SmSPR1* overexpressing  
411 transgenic plants (Fig. 5D). An Arabidopsis *spr1* mutant rescue experiment was also conducted, and the  
412 *P35S:SmSPR1* overexpression lines were rescued from the oblique phenotype involving the roots and  
413 helical growth of epidermal cell files (Figs. 5A, B). Taken together, previous studies have indeed  
414 neglected the helix phenotype of etiolated seedlings in overexpression *AtSPR1* transgenic lines, and we  
415 inferred that the SmSPR1 and AtSPR1 generally have a similar function of regulating plant phenotypes.

416 In the dark, etiolated seedlings enter a rapid elongation period after three days, and the elongation  
417 zone moves up from the base-middle regions to the apical third of the hypocotyl (Gendreau *et al.*, 1997).  
418 Coincidentally, the helix phenotype of *SPR1*-overexpressing transgenic plants is expressed only at the  
419 upper zone of hypocotyls of etiolated seedlings after three days, which is exactly the time and zone at  
420 which the etiolated seedlings grow rapidly (Fig. 2D). Therefore, the helical phenotype may be related to



421 the rapid growth of the hypocotyl in the dark.

422 In the *Arabidopsis spr1* mutant, three major phenotypes differed from the wild type, which include  
423 roots undergoing oblique growth to the right, helical growth of hypocotyls in both light- and dark-grown  
424 seedlings, and hypocotyl helices expanding and shorting in etiolated seedlings. However, in our  
425 *P35S:SmSPR1* transgenic lines, only the phenotypes of right-handed helix and expansion of etiolated  
426 seedling were observed, which prompted us to find light-correlated factors that interact with SPR1 to  
427 regulate cell expansion and seedling growth. Finally, two light-correlated factors, CSN5A and HY5,  
428 were identified and confirmed to interact with SPR1 *in vivo*. The CSN (COP9 signalosome), which was  
429 identified as a photomorphosis inhibitor in *Arabidopsis*, consists of eight subunits (Wei *et al.*, 1994).  
430 CSN is a metalloproteinase that cleaves covalently linked RUB1/NEDD8 from CRL E3 ubiquitin ligase  
431 of cullin proteins, and this process is known as derubylation/deneddylation (Lyapina *et al.*, 2001). CSN5  
432 is one of the core subunits in the COP9 signalosome, and the derubylase catalytic center is located at the  
433 conserved JAMM motif of the CSN5 subunit (Cope *et al.*, 2002). Previous studies have shown that  
434 SPR1 can be ubiquitinated under salt stress and then degraded by the 26S proteasome (Wang *et al.*,  
435 2011). The interaction between SPR1 and CNS5A indicates that the COP9 signalosome participates in  
436 SPR1 ubiquitination. CSN also has kinase activity or can bind to kinase-associated proteins and may  
437 exist in post-translational modification mechanisms (such as phosphorylation) (Meister *et al.*, 2016). MT  
438 end-binding protein EB1 can degraded by the ubiquitin system, and CSN has the ability to stabilize EB  
439 by binding to it via the CSN5 subunit, which mediates phosphorylation of EB1 and prevents EB1 from  
440 degradation (Peth *et al.*, 2007). Whether SPR1 can also be phosphorylated by CSN needs further  
441 investigation.

442 HY5 is a member of bZIP transcription factor family that regulates fundamental developmental  
443 processes such as inhibition of hypocotyl growth, lateral root development, cell elongation, pigment  
444 accumulation, and other phenotypes related to photomorphogenesis (Gangappa and Botto, 2016). In the  
445 dark, HY5 can be degraded by ubiquitination of COP1, thereby inhibiting the occurrence of light  
446 morphology (Oyama *et al.*, 1997). Keech *et al.* proposed that HY5 is repressed in destabilizing the  
447 cortical MT array in the epidermis and mesophyll cells during leaf senescence in the dark (Olivier *et al.*,  
448 2011), i.e., HY5 can indirectly promote the stability of MTs, which is similar to the function of SPR1.  
449 Our Y2H and BiFC assays showed that SPR1 interacts with HY5 *in vivo*, which prompted us to  
450 hypothesize that SPR1 and HY5 synergistically facilitate MT stabilization in the presence of light. HY5  
451 also positively controls cell proliferation in the secondary thickening and negatively regulates lateral

452 root formation, which may influence cell mitosis and division (Chen and Han, 2016; Oyama *et al.*, 1997).  
453 Taking this together with the fact that MTs are involved in cell division as major components of spindle  
454 and SPR1 interacts with HY5, we propose that SPR1 and HY5 interact with each other during the cell  
455 cycle. To conclude, in view of these new findings, we propose a tentative model wherein SPR1 regulates  
456 the morphology of MTs by interacting with different proteins in light and dark conditions. In the  
457 presence of light, SPR1 binds to CSN and HY5. In the dark, SPR1 only binds to CSN to regulate the  
458 morphology of MTs, further regulating cell elongation and directional organ growth (Fig. 7A).

459 The reason for the helix of *spr1* transgenic plants is caused by isotropic cell expansion, which there is  
460 widespread consensus about. However, the cause of the isotropic expansion of cells has been  
461 controversial, particularly with regard to whether the isotropic growth of hypocotyl cells is caused by  
462 changes in the morphology of microtubule arrays. Furutani *et al.* (2000) suggested that a defect in MT  
463 organization results in reduced anisotropic growth. MT arrays are more irregularly oriented in ground  
464 tissue cells than in epidermal cells in etiolated *spr1* hypocotyls, and this varying degree of MT defects  
465 cause isotropic cell growth (Furutani *et al.*, 2000). Nakajima *et al.* (2004) also observed oblique MT  
466 arrays in *spr1* hypocotyls and roots, and they agree that defective MTs cause isotropic cell growth that  
467 further leads to a helix morphology of tissues (Nakajima *et al.*, 2004). However, Sedbrook *et al.* (2004)  
468 obtained different results in relation to the *spr1* phenotype; they found that directional cell expansion is  
469 discordant with MT oblique arrangements and suggested that the pitch of MTs in epidermal cells does  
470 not guide epidermal cell file twisting (Sedbrook *et al.*, 2004). Our study found that hypocotyls of  
471 etiolated seedlings in *SPR1*-overexpressing transgenic plants showed a pronounced phenomenon of  
472 oblique MT arrays. However, at roots where helix growth does not occur, the morphology of MTs did  
473 not exhibit any changes, and there was no difference in the morphology of MTs between the transgenic  
474 and wild-type plants in the presence of light (Figs. 3E, F). Thus, we suggest that the oblique MT array is  
475 directly related to isotropic cell growth. However, whether the oblique MT array leads to isotropic cell  
476 growth or isotropic growth of cells causes oblique of MTs could not be determined in the present study.  
477 We prefer that SPR1 affects the morphology of MTs, which leads to a decrease in anisotropic growth of  
478 cells. Because, the known function of SPR1 is to stabilize MTs that are related to the synthesis of  
479 cellulose, which is synthesized along MTs, and the arrangement of fibers is related to the morphology of  
480 the cell walls and cells (Himmelspach *et al.*, 2003). Changes in MT structure could result in alterations  
481 in the alignment of cellulose, which in turn leads to modifications in cell morphology.

482 Furutani *et al.* (2000) proposed a model for the *spr1* helical phenotype. In the axial direction of cell

483 tissues, loss of anisotropic growth of inner cells leads to cell shortening, which ultimately results in plant  
484 shortening. Compared to shortened internal cells, the length of epidermal cells does not change. To  
485 compensate for this difference, epidermal cells are skewed to maintain the same length as internal  
486 cells (Furutani *et al.*, 2000). This model has been used to explain the spiral phenotype of *spr1* (Nakajima  
487 *et al.*, 2004; Nakajima *et al.*, 2006; Sedbrook *et al.*, 2004). Overexpression of *SmSPR1* was also  
488 observed in the helix phenotype; the results of semi-thin section assays and PI staining experiments  
489 showed isotropic growth and expansion of cells in transgenic plants (Figs. 3B, D). However, the  
490 hypocotyls of *SmSPR1* overexpressing transgenic lines did not become shorter (Fig. 2). The shortening  
491 of hypocotyls is one of the main characteristics of the above model, which is discordant with our results  
492 and cannot explain the *SmSPR1* overexpression helix phenotype. According to the model,  
493 *SmSPR1*-overexpressing transgenic lines both have helices, and thus, the absence of shortened  
494 hypocotyls is a contradictory finding. How do we explain this phenotype of *SmSPR1* overexpressing  
495 transgenic lines? Nakajima *et al.* (2004) found that the overexpression of *AtSPR1* causes a small increase  
496 in the elongation of hypocotyls (Nakajima *et al.*, 2004). Taken together, our results suggest that the  
497 contradictory phenotype of *SmSPR1* overexpression transgenic lines could be attributable to both  
498 increased elongation and isotropic growth of hypocotyl cells. We can also assume that the expression  
499 level of *SPR1* in the Arabidopsis wild type does not meet the maximum elongation of the hypocotyl, and  
500 increased expression of *SPR1* may accelerate hypocotyl elongation.

501 How can we explain the spiral phenomenon of hypocotyl caused by overexpression of *SPR1*? We  
502 propose a model in which the *SPR1* regulates MT polymerization in addition to stabilizing MT. The  
503 stability and polymerization of MTs determines the morphology of MTs. Both the *spr1* mutant and  
504 overexpressing *SPR1* lines showed a disruption of this balance, which in turn lead to the helical  
505 orientation of the MTs (Fig. 7B). Our pharmacology experiments data demonstrated that *SmSPR1*  
506 overexpressing transgenic plants have strong MT depolymerization tolerance relative to the wild-type  
507 plants (Figs. 4C-G), demonstrating that MTs of transgenic plants are more stable than those of wild-type  
508 plants. Taxol (paclitaxel) is an MT-stabilizing drug often used for MT stability studies. Taxol and  
509 propyzamide both caused identical handedness of Arabidopsis seedlings, despite they have the opposite  
510 effect on the polymerization of MTs (Furutani *et al.*, 2000; Sedbrook *et al.*, 2004). In wild-type seedlings,  
511 0.3  $\mu\text{M}$  taxol leading to a clockwise spiral of cotyledons, and 1  $\mu\text{M}$  taxol resulting in root reduced  
512 growth and left-hand bending (Furutani *et al.*, 2000). Both *SPR1* and taxol act to stabilize the MTs;  
513 increased expression of *SPR1* and adding taxol both result in the helix phenotype of Arabidopsis, which

514 indirectly demonstrates that overexpression of *SPR1*, like the addition of taxol, can cause MTs to be  
515 over stabilized, thus resulting in changes in the morphology of MTs and plants.

## 516 **Acknowledgments**

517 This work was supported by The Fundamental Research Funds for the Central Non-profit Research  
518 Institution of Chinese Academy of Forestry (CAFYBB2018QB001). We thank LetPub  
519 ([www.letpub.com](http://www.letpub.com)) for its linguistic assistance during the preparation of this manuscript.

## 520 **Supplementary data**

521 Supplementary data are available at JXB online.

522 **Table S1.** List of primers used for cloning *SmSPR1*, *SmCSN5A*, *SmHY5* and *SmCOPI*

523 **Table S2.** List of primers used for Semi-quantitative RT-PCR of *SmSPR1* and *AtSPR1*

524 **Table S3.** List of primers used for real-time RT-PCR analysis

525 **Table S4.** List of primers used for overexpression construct *SmSPR1* and *AtSPR1*

526 **Table S5.** List of primers used for construction of prokaryotic expression vector

527 **Table S6.** List of primers used for Yeast Two-Hybrid

528 **Table S7.** List of primers used for BiFC.

529 **Fig. S1.** Phenotype of overexpression *SmSPR1* in the condition of light. (A) Seedling phenotype  
530 between wild-type and *SmSPR1* transgenic plants. (B) Stem cross section of wild-type and transgenic  
531 Arabidopsis plants. 1-5 show five equal parts from shoot tip of the stem to the base. (C) Micrographs of  
532 the upper and lower hypocotyl and root. (D) PI stain of hypocotyl and root of the wild-type and  
533 transgenic seedlings in the presence of light. Bars = 25  $\mu\text{m}$ .

534 **Fig. S2.** PI staining of hypocotyl and root of the wild-type and transgenic etiolated seedlings from three  
535 to seven days of growth. Bars = 100  $\mu\text{m}$ .

536 **Fig. S3.** Hypocotyl growth trajectory of wild-type and transgenic etiolated seedlings from three to seven  
537 days of growth. Data are expressed as the mean  $\pm$ SD of > 30 seedlings. Significant differences were  
538 determined using the Student's *t* test ( $P < 0.01$ ).

539 **Fig. S4.** The *SmSPR1*: GFP localization. (A) Confocal images of *SmSPR1*: GFP (green). (B) PI-stained  
540 root (red) in the condition of light. Bars = 20  $\mu\text{m}$ .

541 **Fig. S5.** *SmSPR1* transgenic seedlings have increased PPM tolerance. (A) Seedling phenotypes of the  
542 wild-type and transgenic plants on culture medium containing PPM. (B) PI staining of hypocotyl and  
543 roots of the wild-type and transgenic plants with the increasing concentrations of PPM in the dark. Bars

544 = 50  $\mu\text{m}$ .

545 **Fig. S6.** Seedling phenotype in the wild-type and *AtSPR1* transgenic plants. Bars = 1 cm.

546 **Fig. S7.** Interactions among SPR1, COP1, and HY5 using the BiFC system. (A) Negative control. (B)

547 Positive control. (C) SmSPR1 interact with CSN5A and HY5 in the dark. (D) SmSPR1 interact with

548 COP1 in both light and dark conditions. Bars = 20  $\mu\text{m}$ .

## References

- And AVA, Deng XW.** 1996. Light control of seedling development. *Annual Review of Plant Physiology & Plant Molecular Biology* **47**, 215-243.
- Barker JHA, Pahlich A, Trybush S, Edwards KJ, Karp A.** 2010. Microsatellite markers for diverse *Salix* species. *Molecular Ecology Resources* **3**, 4-6.
- Brandizzi F, Wasteneys GO.** 2013. Cytoskeleton-dependent endomembrane organization in plant cells: an emerging role for microtubules. *Plant Journal* **75**, 339–349.
- Castillon, Alicia, Shen, Hui, Huq, Enamul.** 2007. Phytochrome Interacting Factors: central players in phytochrome-mediated light signaling networks. *Trends in Plant Science* **12**, 514.
- Chen H, Han R.** 2016. Characterization of Actin Filament Dynamics during Mitosis in Wheat Protoplasts under UV-B Radiation. *Scientific Reports* **6**, 20115.
- Cope GA, Suh GSB, Aravind L, Schwarz SE, Zipursky SL, Koonin EV, Deshaies RJ.** 2002. Role of Predicted Metalloprotease Motif of Jab1/Csn5 in Cleavage of Nedd8 from Cull1. *Science* **298**, 608-611.
- Crowell EF, Timpano H, Desprez T, Franssen-Verheijen T, Emons AM, Häfte H, Vernhettes S.** 2011. Differential Regulation of Cellulose Orientation at the Inner and Outer Face of Epidermal Cells in the *Arabidopsis* Hypocotyl. *Plant Cell* **23**, 2592.
- Earley KW, Haag JR, Pontes O, Opper K, Juehne T, Song K, Pikaard CS.** 2010. Gateway-compatible vectors for plant functional genomics and proteomics. *Plant Journal* **45**, 616-629.
- Foster R, Mattsson O, Mundy J.** 2003. Plants flex their skeletons. *Trends in Plant Science* **8**, 202.
- Fujita M, Lechner B, Barton DA, Overall RL, Wasteneys GO.** 2012. The missing link: do cortical microtubules define plasma membrane nanodomains that modulate cellulose biosynthesis? *Protoplasma* **249**, 59-67.
- Furutani I, Watanabe Y, Prieto R, Masukawa M, Suzuki K, Naoi K, Thitamadee S, Shikanai T, Hashimoto T.** 2000. The *SPIRAL* genes are required for directional control of cell elongation in *Arabidopsis thaliana*. *Development* **127**, 4443-4453.
- Galvão VC, Fankhauser C.** 2015. Sensing the light environment in plants: photoreceptors and early signaling steps. *Current Opinion in Neurobiology* **34**, 46.
- Galva C, Kirik V, Lindeboom JJ, Kaloriti D, Rancour DM, Hussey PJ, Bednarek SY, Ehrhardt DW, Sedbrook JC.** 2014. The microtubule plus-end tracking proteins SPR1 and EB1b interact to maintain polar cell elongation and directional organ growth in *Arabidopsis*. *Plant Cell* **26**, 4409-4425.
- Gangappa SN, Botto JF.** 2016. The Multifaceted Roles of HY5 in Plant Growth and Development.



Molecular Plant **9**, 1353-1365.

**Gendreau E, Traas J, Desnos T, Grandjean O, Caboche M, Hofte H.** 1997. Cellular basis of hypocotyl growth in *Arabidopsis thaliana*. *Plant Physiology* **114**, 295-305.

**Himmelspach R, Williamson RE, Wasteneys GO.** 2003. Cellulose microfibril alignment recovers from DCB-induced disruption despite microtubule disorganization. *Plant Journal* **36**, 565-575.

**Hwang SM, Kim DW, Woo MS, Jeong HS, Son YS, Akhter S, Choi GJ, Bahk JD.** 2014. Functional characterization of *Arabidopsis* HsfA6a as a heat-shock transcription factor under high salinity and dehydration conditions. *Plant Cell & Environment* **37**, 1202-1222.

**Lian N, Liu X, Wang X, Zhou Y, Li H, Li J, Mao T.** 2017. COP1 mediates dark-specific degradation of microtubule-associated protein WDL3 in regulating *Arabidopsis* hypocotyl elongation. *Proceedings of the National Academy of Sciences of the United States of America* **114**, 12321-12326.

**Liu X, Qin T, Ma Q, Sun J, Liu Z, Yuan M, Mao T.** 2013. Light-regulated hypocotyl elongation involves proteasome-dependent degradation of the microtubule regulatory protein WDL3 in *Arabidopsis*. *Plant Cell* **25**, 1740-1755.

**Lucas JR, Courtney S, Hassfurder M, Dhingra S, Bryant A, Shaw SL.** 2011.

Microtubule-Associated Proteins MAP65-1 and MAP65-2 Positively Regulate Axial Cell Growth in Etiolated *Arabidopsis* Hypocotyls. *Plant Cell* **23**, 1889.

**Lyapina S, Cope G, Shevchenko A, Serino G, Tsuge T, Zhou C, Wolf DA, Wei N, Shevchenko A, Deshaies RJ.** 2001. Promotion of NEDD-CUL1 conjugate cleavage by COP9 signalosome. *Science* **292**, 1382-1385.

**Meister C, Gulko MK, Köhler AM, Braus GH.** 2016. The devil is in the details: comparison between COP9 signalosome (CSN) and the LID of the 26S proteasome. *Current Genetics* **62**, 129-136.

**Nakajima K, Furutani I, Tachimoto H, Matsubara H, Hashimoto T.** 2004. SPIRAL1 encodes a plant-specific microtubule-localized protein required for directional control of rapidly expanding *Arabidopsis* cells. *Plant Cell* **16**, 1178-1190.

**Nakajima K, Kawamura T, Hashimoto T.** 2006. Role of the SPIRAL1 gene family in anisotropic growth of *Arabidopsis thaliana*. *Plant & Cell Physiology* **47**, 513-522.

**Olivier K, Edouard P, Laurent G, Abdul A, Catherine B, Steven M S, Per Gm.** 2011. Leaf senescence is accompanied by an early disruption of the microtubule network in *Arabidopsis*. *Plant Signaling & Behavior* **154**, 1710-1720.

**Oyama T, Shimura Y, Okada K.** 1997. The *Arabidopsis* HY5 gene encodes a bZIP protein that

- regulates stimulus-induced development of root and hypocotyl. *Genes Dev* **11**, 2983-2995.
- Peth A, Boettcher JP, Dubiel W.** 2007. Ubiquitin-dependent proteolysis of the microtubule end-binding protein 1, EB1, is controlled by the COP9 signalosome: possible consequences for microtubule filament stability. *Journal of Molecular Biology* **368**, 550-563.
- Sambade A, Pratap A, Buschmann H, Morris RJ, Lloyd C.** 2012. The Influence of Light on Microtubule Dynamics and Alignment in the Arabidopsis Hypocotyl. *Plant Cell* **24**, 192-201.
- Sedbrook JC, Ehrhardt DW, Fisher SE, Scheible WR, Somerville CR.** 2004. The Arabidopsis SKU6/SPIRAL1 Gene Encodes a Plus End-Localized Microtubule-Interacting Protein Involved in Directional Cell Expansion. *Plant Cell* **16**, 1506-1520.
- Sedbrook JC, Kaloriti D.** 2008. Microtubules, MAPs and plant directional cell expansion. *Trends Plant Sci* **13**, 303-310.
- Shoji T, Narita NN, Hayashi K, Hayashi K, Asada J, Hamada T, Sonobe S, Nakajima K, Hashimoto T.** 2004. Plant-specific microtubule-associated protein SPIRAL2 is required for anisotropic growth in Arabidopsis. *Plant Physiology* **136**, 3933-3944.
- Sparkes IA, John R, Anne K, Chris H.** 2006. Rapid, transient expression of fluorescent fusion proteins in tobacco plants and generation of stably transformed plants. *Nature Protocols* **1**, 2019-2025.
- Sun J, Ma Q, Mao T.** 2015. Ethylene Regulates the Arabidopsis Microtubule-Associated Protein WAVE-DAMPENED2-LIKE5 in Etiolated Hypocotyl Elongation. *Plant Physiology* **169**, 325-337.
- Tamura K, Stecher G, Peterson D, Filipski A, Kumar S.** 2013. MEGA6: Molecular Evolutionary Genetics Analysis version 6.0. *Mol Biol Evol* **30**, 2725-2729.
- Wang S, Kurepa J, Hashimoto T, Smalle JA.** 2011. Salt Stress-Induced Disassembly of Arabidopsis Cortical Microtubule Arrays Involves 26S Proteasome-Dependent Degradation of SPIRAL1. *Plant Cell* **23**, 3412-3427.
- Wei N, Chamovitz DA, Deng aX.** 1994. Arabidopsis COP9 is a component of a novel signaling complex mediating light control of development. *Cell* **78**, 117-124.
- Yi Z, Bin T, Ming L, Yin L, Chen L, Chen C, Chun-Wei Y, Songguang Y, Shuai D, Jiuxiao R.** 2013. HISTONE DEACETYLASE19 interacts with HSL1 and participates in the repression of seed maturation genes in Arabidopsis seedlings. *Plant Cell* **25**, 134-148.
- Yoo SD, Cho YH, Sheen J.** 2007. Arabidopsis mesophyll protoplasts: a versatile cell system for transient gene expression analysis. *Nature Protocols* **2**, 1565-1572.
- Zhang X, Henriques R, Lin SS, Niu QW, Chua NH.** 2006. Agrobacterium-mediated transformation of

*Arabidopsis thaliana* using the floral dip method. *Nature Protocols* **1**, 641.

## Figure legends

**Fig. 1.** Gene sequence analysis, tissue-specific expression, and cellular localization of SmSPR1. (A) An unrooted phylogenetic tree was generated using full-length protein sequences of *Salix* and *Arabidopsis* SPR1 family isoforms. A neighbor-joining phylogenetic tree was generated using MEGA 6.0 with 1,000 bootstrap replicates. (B) Protein sequence alignment of *Salix* SPR1. Conserved residues are shown in black boxes. ClustalW with default settings was used for protein alignment. (C) qRT-PCR-based transcript abundance of six *Salix SPR1* genes. Expression levels were normalized to the geometric mean of three housekeeping genes (*GAPDH*). (D) to (I) Histochemical assay for GUS activity in transgenic tobacco lines. D-G, Transversal section of the of stem, midvein, axillary bud; f, Root; H, seedling grown in the dark for 12 days; I, Twenty-day-old seedling grown under light. Bars in (D-I) = 100  $\mu$ m. (J) to (V) Subcellular localization of SmSPR1 in *Arabidopsis* epidermal cells and mesophyll protoplasts. J, O and S are fluorescence signals of GFP; K, P and T are fluorescent in the chloroplast; L and U under brightfield optics; m, r, and v are merged by GFP, chloroplast and brightfield; Q is merged with GFP and chloroplast. Ca, cambium; x, xylem; ph, phloem; ep, epidermis; nu, nucleus; ch, chloroplast; mem, cytomembrane; cyt, cytoplasm; bars in (J-V) = 10  $\mu$ m.

**Fig. 2.** Phenotypes of transgenic plants. (A) *P35S: SmSPR1* transgenic plant showing a right-handed helical hypocotyl in etiolated seedlings compared to the wild-type. (B) Hypocotyl of *P35S: SmSPR1* transgenic plants showed right-tilted growth compared to the wild-type. (C) Semi-quantitative RT-PCR analyses of *SmSPR1* and *AtSPR1* genes in the roots (R), stems (S), and leaves (L). (D) Scanning electron microscopy of the upper and lower hypocotyls of etiolated transgenic seedlings. (E) Hypocotyl length of etiolated seedlings of transgenic and wild-type plants. (F) Hypocotyl width of etiolated seedlings in transgenic and wild-type plants. (G) Root length of etiolated seedlings of transgenic and wild-type plants. (H) Hypocotyl growth trajectory of etiolated seedlings of transgenic and wild-type plants (seven-day old seedlings). For (E) to (H), data are expressed as the mean  $\pm$  SD of >30 seedlings. Asterisks indicate significant differences using the Student's *t* test ( $P < 0.01$ ). Bars in (A) to (D) = 100  $\mu$ m.

**Fig. 3.** Cellular and MT differences between wild-type and transgenic plant. (A) Cross-sectional hypocotyl area of the wild-type plants. (B) Cross-sectional hypocotyl area of the transgenic plants. (C) Longitudinal section hypocotyl area of the wild-type plants. (D) Longitudinal section hypocotyl area of the transgenic plants. (E) MT arrangement in the hypocotyl of wild-type *Arabidopsis* grown in the presence of light. (F) MT arrangement in the hypocotyl of transgenic *Arabidopsis* grown in the presence of light. (G) MT arrangement in the hypocotyl of wild-type *Arabidopsis* grown in the dark. (H) MT

arrangement in the hypocotyl of transgenic *Arabidopsis* grown in the dark. (I) Frequency of different MT orientation patterns in dark-grown hypocotyls of wild-type and transgenic plants. The data are expressed as the mean  $\pm$  SD of > 30 seedlings. (J) Cell shapes and sizes of different layers from one side to the opposite side of hypocotyls in the transgenic etiolated seedling. Bars in (A) to (J) = 100  $\mu$ m.

**Fig. 4.** SmSPR1 protein localization and increase in PPM tolerance. (A) Confocal images of SmSPR1: GFP hypocotyl (green) and immunofluorescence stained with anti-tubulin antibodies (red). (B) SmSPR1: Changes in GFP fluorescence after the addition and removal of the MT-depolymerizing drug, PPM. (C) Seedling phenotypes of the wild-type and transgenic plants grown in a medium containing 9  $\mu$ M PPM. (D) PI staining of roots of the wild-type and transgenic plants with higher concentrations of PPM in the presence of light. (E) Photomicrographs of roots from the wild-type and transgenic seedlings treated with 7  $\mu$ M PPM. (F) Root length of wild-type and transgenic seedlings treated with 7  $\mu$ M PPM. (G) Root width of the wild-type and transgenic seedlings treated with 7  $\mu$ M PPM. For (F) to (G), the data are expressed as the mean  $\pm$  SD of > 30 seedlings. Asterisks indicate significant differences using the Student's *t* test ( $P < 0.01$ ). Bars in (A) and (B) = 10  $\mu$ m, (C) = 1 cm, (D) and (E) = 100  $\mu$ m.

**Fig. 5.** Overexpression of *SmSPR1* rescues in the *spr1* background and overexpression of *Arabidopsis* SPR1 causes a similar hypocotyl helix phenotype. (A) Phenotype of the wild-type, *spr1* mutant and overexpression *SmSPR1* transgenic plants in the *spr1* mutant background in the presence of light. (B) Etiolated seedling phenotype of the wild-type, *spr1* mutant and overexpression *SmSPR1* transgenic plants in the *spr1* mutant background; Blue short arrows show different root morphologies; Red boxes and long arrows indicate magnified hypocotyls. (C) Semi-quantitative RT-PCR analyses of the wild-type, *spr1* mutant and overexpression *SmSPR1* lines (L1-L6). (D) *P35S: AtSPR1* transgenic plant shows a right-handed helix hypocotyl in etiolated seedlings compared to the wild type. (E) Semi-quantitative RT-PCR analyses of wild type and overexpression *AtSPR1* lines (L1-L7).

**Fig. 6.** SmSPR1, CSN5A, and HY5 interaction in vivo. (A) Five-day-old etiolated seedlings were transferred to light conditions for another four days of growth. Bars = 10  $\mu$ m. (B) Five-day-old light-grown seedlings were transferred to the dark for another six days of growth; Red arrows show scanning electron micrographs of the hypocotyl. (C) Interactions of SPR1 and CSN5A, HY5, and COP1 in a Y2H system. (D) SPR1, CSN5A, and HY5 interact with each other in the BiFC system. Bars= 10  $\mu$ m.

**Fig. 7.** Model of SPR1, CSN, and HY5 interactions and helical growth. (A) In the light, SPR1, CSN, and HY5 could interact to each other for the stabilization or reorganization MTs and ultimately mediate cell

elongation or directional organ growth. In the dark, SPR1 only interacts with CSN to control the next MT-related biological process. (B) In wild-type plants, the expression level of SPR1 accords with the balance of stability and polymerization of MTs. MTs arrays are transverse to the elongation axis, which result in a normal anisotropic expansion of cells. Meanwhile, in the SPR1 overexpression transgenic, *spr1* mutant, and MTs drug treatments plants, the balance of MTs was disrupted, which in turn led to the helix of the MTs and following isotropic expansion of cells.



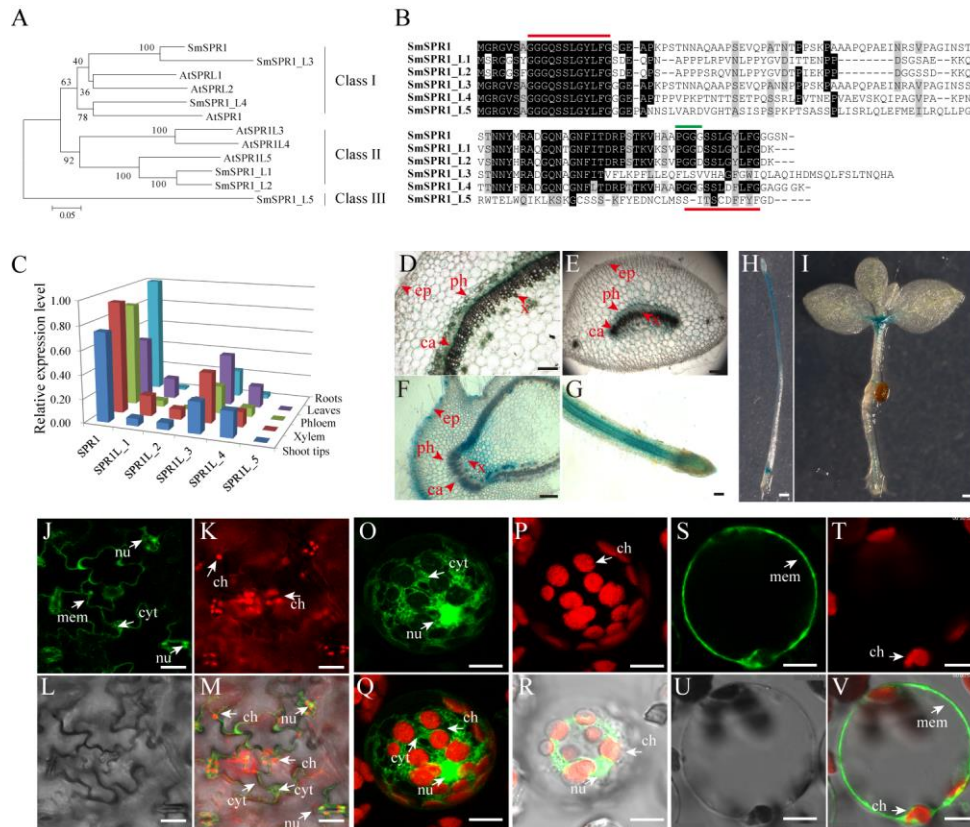

**Fig. 1.** Gene sequence analysis, tissue-specific expression, and cellular localization of SmSPR1. (A) An unrooted phylogenetic tree was generated using full-length protein sequences of *Salix* and *Arabidopsis* SPR1 family isoforms. A neighbor-joining phylogenetic tree was generated using MEGA 6.0 with 1,000 bootstrap replicates. (B) Protein sequence alignment of *Salix* SPR1. Conserved residues are shown in black boxes. ClustalW with default settings was used for protein alignment. (C) qRT-PCR-based transcript abundance of six *Salix* SPR1 genes. Expression levels were normalized to the geometric mean of three housekeeping genes (*GAPDH*). (D) to (I) Histochemical assay for GUS activity in transgenic tobacco lines. D-G, Transversal section of the of stem, midvein, axillary bud; f, Root; H, seedling grown in the dark for 12 days; I, Twenty-day-old seedling grown under light. Bars in (D-I) = 100  $\mu$ m. (J) to (V) Subcellular localization of SmSPR1 in Arabidopsis epidermal cells and mesophyll protoplasts. J, O and S are fluorescence signals of GFP; K, P and T are fluorescent in the chloroplast; L and U under brightfield optics; m, r, and v are merged by GFP, chloroplast and brightfield; Q is merged with GFP and chloroplast. Ca, cambium; x, xylem; ph, phloem; ep, epidermis; nu, nucleus; ch, chloroplast; mem, cytomembrane; cyt, cytoplasm; bars in (J-V) = 10  $\mu$ m.

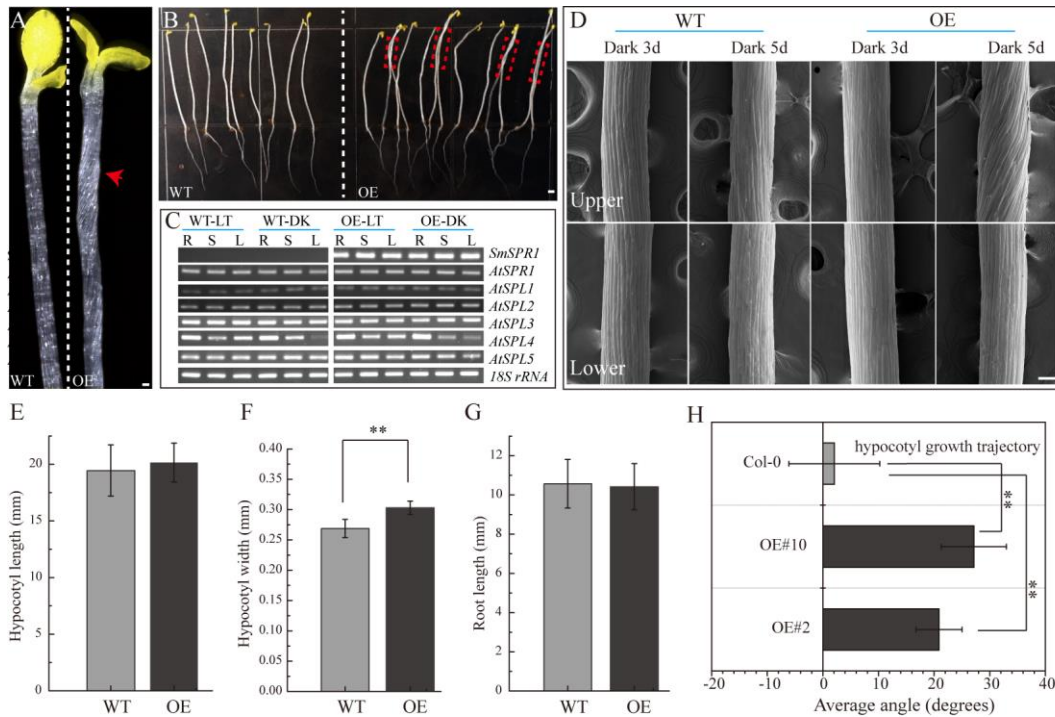

**Fig. 2.** Phenotypes of transgenic plants. (A) *P35S: SmSPR1* transgenic plant showing a right-handed helical hypocotyl in etiolated seedlings compared to the wild-type. (B) Hypocotyl of *P35S: SmSPR1* transgenic plants showed right-tilted growth compared to the wild-type. (C) Semi-quantitative RT-PCR analyses of *SmSPR1* and *AtSPR1* genes in the roots (R), stems (S), and leaves (L). (D) Scanning electron microscopy of the upper and lower hypocotyls of etiolated transgenic seedlings. (E) Hypocotyl length of etiolated seedlings of transgenic and wild-type plants. (F) Hypocotyl width of etiolated seedlings in transgenic and wild-type plants. (G) Root length of etiolated seedlings of transgenic and wild-type plants. (H) Hypocotyl growth trajectory of etiolated seedlings of transgenic and wild-type plants (seven-day old seedlings). For (E) to (H), data are expressed as the mean  $\pm$  SD of >30 seedlings. Asterisks indicate significant differences using the Student's *t* test ( $P < 0.01$ ). Bars in (A) to (D) = 100  $\mu$ m.

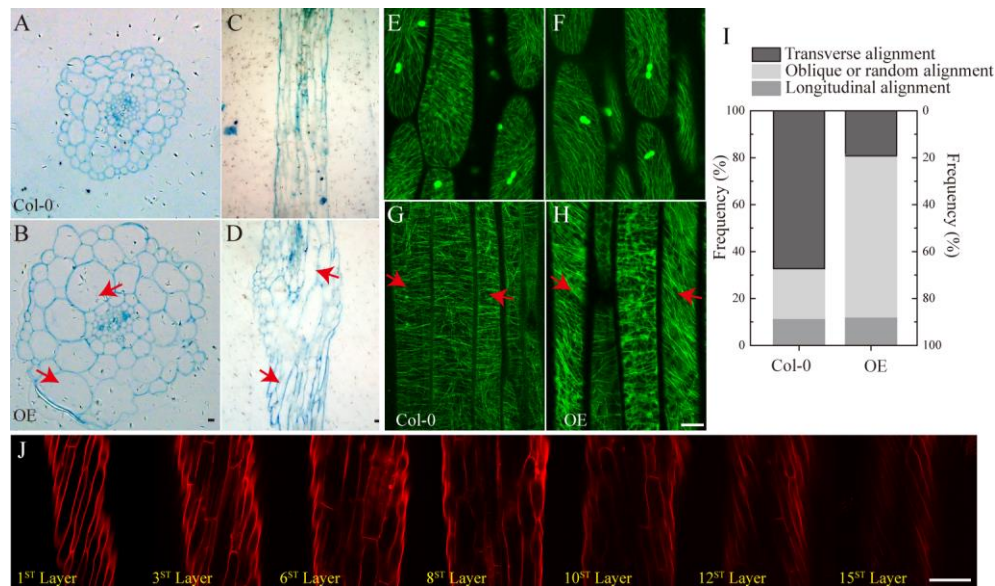

**Fig. 3.** Cellular and MT differences between wild-type and transgenic plant. (A) Cross-sectional hypocotyl area of the wild-type plants. (B) Cross-sectional hypocotyl area of the transgenic plants. (C) Longitudinal section hypocotyl area of the wild-type plants. (D) Longitudinal section hypocotyl area of the transgenic plants. (E) MT arrangement in the hypocotyl of wild-type *Arabidopsis* grown in the presence of light. (F) MT arrangement in the hypocotyl of transgenic *Arabidopsis* grown in the presence of light. (G) MT arrangement in the hypocotyl of wild-type *Arabidopsis* grown in the dark. (H) MT arrangement in the hypocotyl of transgenic *Arabidopsis* grown in the dark. (I) Frequency of different MT orientation patterns in dark-grown hypocotyls of wild-type and transgenic plants. The data are expressed as the mean  $\pm$ SD of > 30 seedlings. (J) Cell shapes and sizes of different layers from one side to the opposite side of hypocotyls in the transgenic etiolated seedling. Bars in (A) to (J) = 100  $\mu$ m.

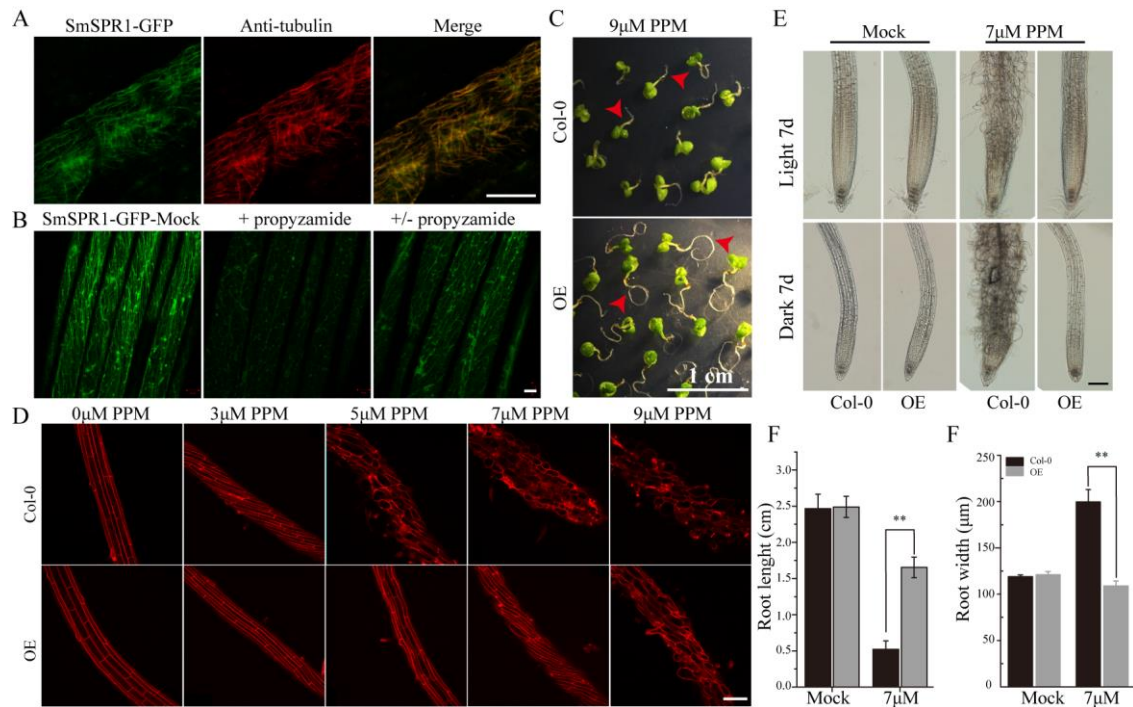

**Fig. 4.** SmSPR1 protein localization and increase in PPM tolerance. (A) Confocal images of SmSPR1: GFP hypocotyl (green) and immunofluorescence stained with anti-tubulin antibodies (red). (B) SmSPR1: GFP-Mock changes in GFP fluorescence after the addition and removal of the MT-depolymerizing drug, PPM. (C) Seedling phenotypes of the wild-type and transgenic plants grown in a medium containing 9 μM PPM. (D) PI staining of roots of the wild-type and transgenic plants with higher concentrations of PPM in the presence of light. (E) Photomicrographs of roots from the wild-type and transgenic seedlings treated with 7 μM PPM. (F) Root length of wild-type and transgenic seedlings treated with 7 μM PPM. (G) Root width of the wild-type and transgenic seedlings treated with 7 μM PPM. For (F) to (G), the data are expressed as the mean ± SD of > 30 seedlings. Asterisks indicate significant differences using the Student's *t* test ( $P < 0.01$ ). Bars in (A) and (B) = 10 μm, (C) = 1 cm, (D) and (E) = 100 μm.



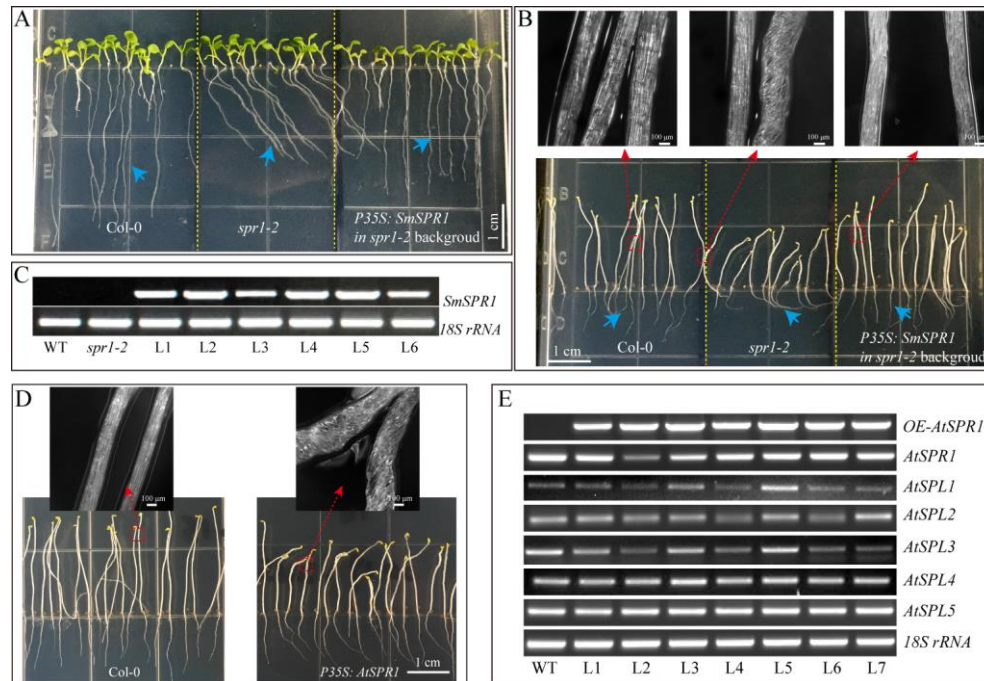

**Fig. 5.** Overexpression of *SmSPR1* rescues in the *spr1* background and overexpression of Arabidopsis SPR1 causes a similar hypocotyl helix phenotype. (A) Phenotype of the wild-type, *spr1* mutant and overexpression *SmSPR1* transgenic plants in the *spr1* mutant background in the presence of light. (B) Etiolated seedling phenotype of the wild-type, *spr1* mutant and overexpression *SmSPR1* transgenic plants in the *spr1* mutant background; Blue short arrows show different root morphologies; Red boxes and long arrows indicate magnified hypocotyls. (C) Semi-quantitative RT-PCR analyses of the wild-type, *spr1* mutant and overexpression *SmSPR1* lines (L1-L6). (D) *P35S: AtSPR1* transgenic plant shows a right-handed helix hypocotyl in etiolated seedlings compared to the wild type. (E) Semi-quantitative RT-PCR analyses of wild type and overexpression *AtSPR1* lines (L1-L7).

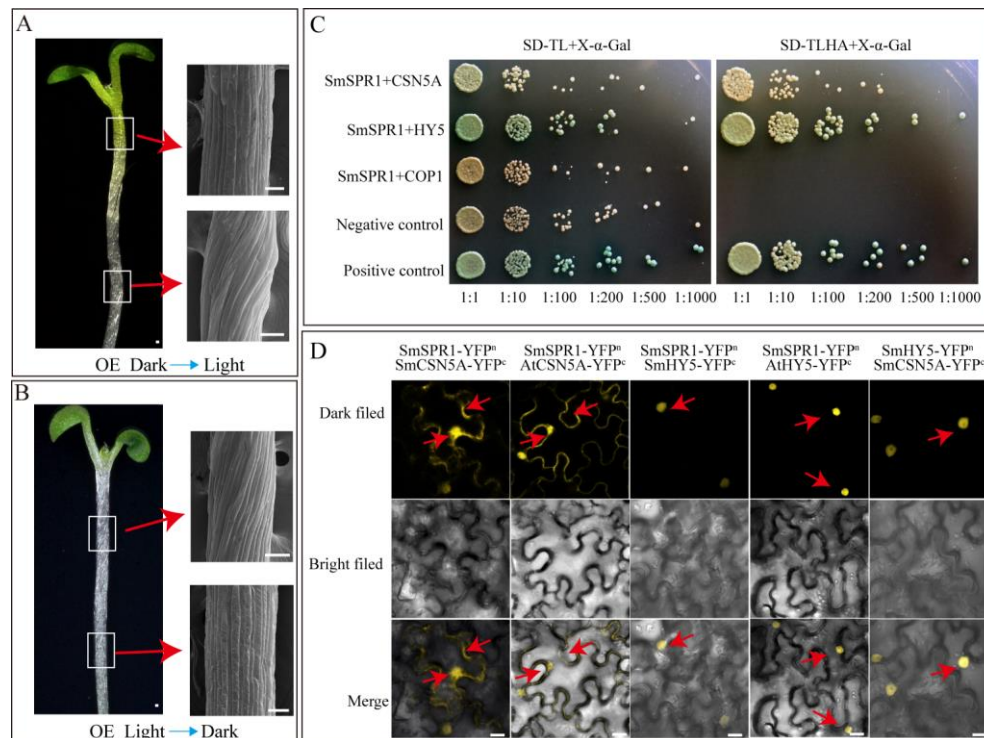

**Fig. 6.** SmSPR1, CSN5A, and HY5 interaction in vivo. (A) Five-day-old etiolated seedlings were transferred to light conditions for another four days of growth. Bars = 10  $\mu$ m. (B) Five-day-old light-grown seedlings were transferred to the dark for another six days of growth; Red arrows show scanning electron micrographs of the hypocotyl. (C) Interactions of SPR1 and CSN5A, HY5, and COP1 in a Y2H system. (D) SPR1, CSN5A, and HY5 interact with each other in the BiFC system. Bars= 10  $\mu$ m.

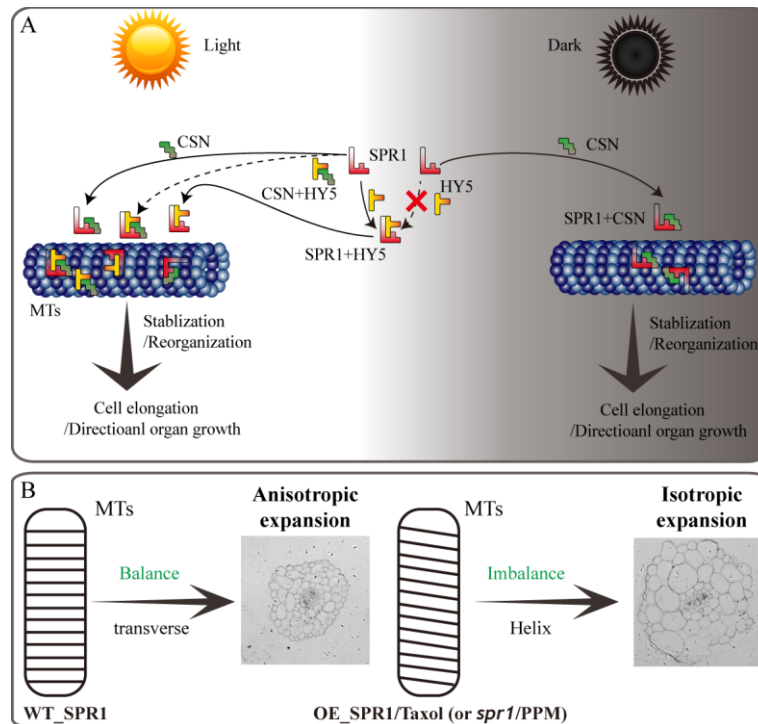

**Fig. 7.** Model of SPR1, CSN, and HY5 interactions and helical growth. (A) In the light, SPR1, CSN, and HY5 could interact to each other for the stabilization or reorganization MTs and ultimately mediate cell elongation or directional organ growth. In the dark, SPR1 only interacts with CSN to control the next MT-related biological process. (B) In wild-type plants, the expression level of SPR1 accords with the balance of stability and polymerization of MTs. MTs arrays are transverse to the elongation axis, which result in a normal anisotropic expansion of cells. Meanwhile, in the SPR1 overexpression transgenic, *spr1* mutant, and MTs drug treatments plants, the balance of MTs was disrupted, which in turn led to the helix of the MTs and following isotropic expansion of cells.
